# Supplementary material for: Application of COSMO-RS-DARE as a Tool for Testing Consistency of Solubility Data: Case of Coumarin in Neat Alcohols
Source: MDPI journal article supplement (doi:10.3390/molecules27165274), 2022-08-18
Supplement: s1 [file s1]

## Supplementary Materials

### **Application of COSMO-RS-DARE as a tool for testing consistency of solubility data: case of coumarin in neat alcohols**

Piotr Cysewski, Tomasz Jeliński and Maciej Przybyłek

*Department of Physical Chemistry, Pharmacy Faculty, Collegium Medicum of Bydgoszcz, Nicolaus Copernicus University in Toruń, Kurpińskiego 5, 85-950 Bydgoszcz, Poland*

**Table S1.** The solubility values of coumarin (CAS: 91-64-5) expressed as molar fractions ( $\times 10^3$ ) along with the standard deviation values ( $n = 3$ ).

| Solvent                             | Temperature [°C] |                   |                   |                   |
|-------------------------------------|------------------|-------------------|-------------------|-------------------|
|                                     | 25               | 30                | 35                | 40                |
| methanol, MeOH<br>(CAS: 67-56-1)    | 77.01 $\pm$ 4.68 | 127.52 $\pm$ 5.07 | 196.63 $\pm$ 7.30 | 286.50 $\pm$ 6.20 |
| ethanol, EtOH<br>(CAS: 64-17-5)     | 49.43 $\pm$ 2.59 | 90.16 $\pm$ 5.57  | 142.45 $\pm$ 5.12 | 210.96 $\pm$ 6.24 |
| 1-propanol, 1PrOH<br>(CAS: 71-23-8) | 41.02 $\pm$ 0.72 | 74.27 $\pm$ 2.42  | 121.65 $\pm$ 5.97 | 181.10 $\pm$ 4.99 |
| 2-propanol, 2PrOH<br>(CAS: 67-63-0) | 30.17 $\pm$ 0.60 | 60.35 $\pm$ 1.81  | 101.22 $\pm$ 4.59 | 154.88 $\pm$ 5.76 |
| 1-butanol, 1BuOH<br>(CAS: 71-36-3)  | 16.95 $\pm$ 1.09 | 34.87 $\pm$ 1.34  | 60.64 $\pm$ 0.77  | 94.59 $\pm$ 2.12  |
| 1-pentanol, 1PeOH<br>(CAS: 71-41-0) | 19.66 $\pm$ 0.28 | 42.95 $\pm$ 1.59  | 77.44 $\pm$ 0.55  | 126.01 $\pm$ 7.64 |
| 1-octanol, 1OcOH<br>(CAS: 111-87-5) | 19.18 $\pm$ 0.67 | 37.37 $\pm$ 1.24  | 67.23 $\pm$ 2.91  | 104.05 $\pm$ 0.71 |

**Table S2.** Statistical characteristics of linear regressions exemplified in Figure 8 and used for back-computations of solubility using COSMO-RS-DARE approach.

| T[°C]                | a±SD       | b±SD        | P      | R <sup>2</sup> <sub>adj</sub> | F      |
|----------------------|------------|-------------|--------|-------------------------------|--------|
| <b>SpMin2_Bhm</b>    |            |             |        |                               |        |
| 25                   | -2.67±0.24 | -1.18±0.31  | <0.001 | 0.952                         | 119.37 |
| 30                   | -2.44±0.20 | -0.87±0.26  | <0.001 | 0.960                         | 143.82 |
| 35                   | -2.25±0.21 | -0.66±0.26  | <0.001 | 0.952                         | 120.39 |
| 40                   | -2.12±0.21 | -0.48±0.27  | =0.001 | 0.941                         | 97.395 |
| <b>R<sub>a</sub></b> |            |             |        |                               |        |
| 25                   | 0.55±0.06  | -12.47±0.90 | <0.001 | 0.931                         | 81.683 |
| 30                   | 0.51±0.06  | -11.20±0.82 | <0.001 | 0.932                         | 83.039 |
| 35                   | 0.47±0.05  | -10.17±0.80 | <0.001 | 0.923                         | 73.298 |
| 40                   | 0.44±0.06  | -9.42±0.83  | =0.001 | 0.908                         | 60.016 |

**Table S3.** Collection of molecular descriptors used for determination of linear regression. The Hansen solubility space distance, R<sub>a</sub>, was calculated according to eq. 3 based on the Hansen solubility parameters ( $\delta_d$ ,  $\delta_p$ ,  $\delta_{HB}$ ). The last column compiles the values of SpMin2\_Bhm of considered alcohols.

| Compound   | $\delta_d$ | $\delta_p$ | $\delta_{HB}$ | R <sub>a</sub> | SpMin2_Bhm |
|------------|------------|------------|---------------|----------------|------------|
| methanol   | 15.1       | 12.3       | 22.3          | 18.42          | 0.42       |
| ethanol    | 15.8       | 8.8        | 19.4          | 15.67          | 0.91       |
| 1-propanol | 16.0       | 6.8        | 17.4          | 14.53          | 1.21       |
| 2-propanol | 15.8       | 6.1        | 16.4          | 14.34          | 1.25       |
| 1-butanol  | 16.0       | 5.7        | 15.8          | 13.89          | 1.41       |
| 1-pentanol | 15.9       | 5.9        | 13.9          | 12.75          | 1.54       |
| 1-octanol  | 16.0       | 5.0        | 11.9          | 12.14          | 1.74       |
| coumarin   | 20.0       | 12.5       | 6.7           | -              | -          |
